# Supplementary material
Source: Springer Nature journal article supplement (https://www.springermedizin.de/resource/supplementary/13075_2010_2873_MOESM5_ESM.pdf/9693080)

## Control

## CAIA

Axial  
Slices

## Quantification

FMT 2500

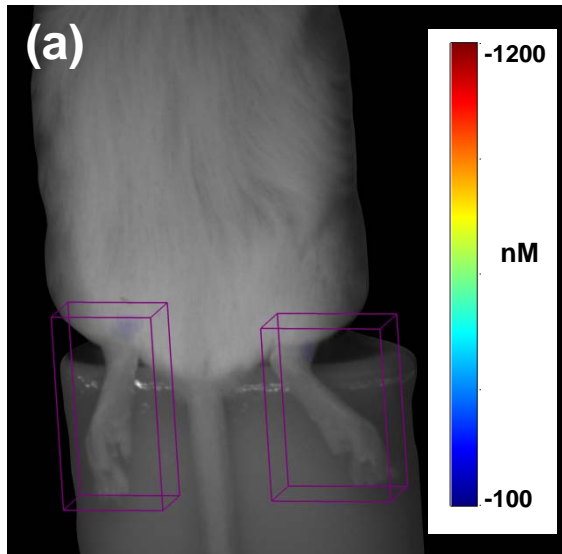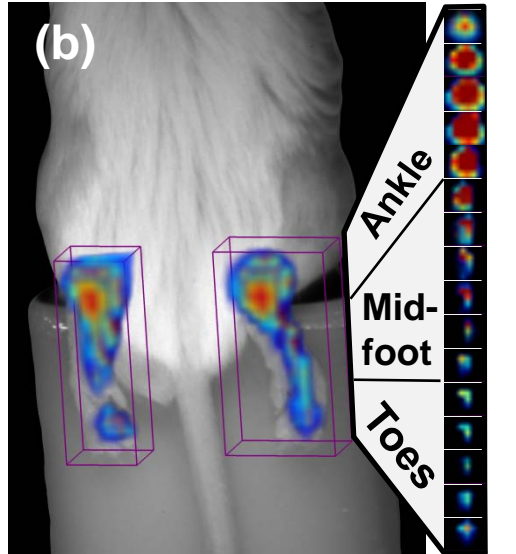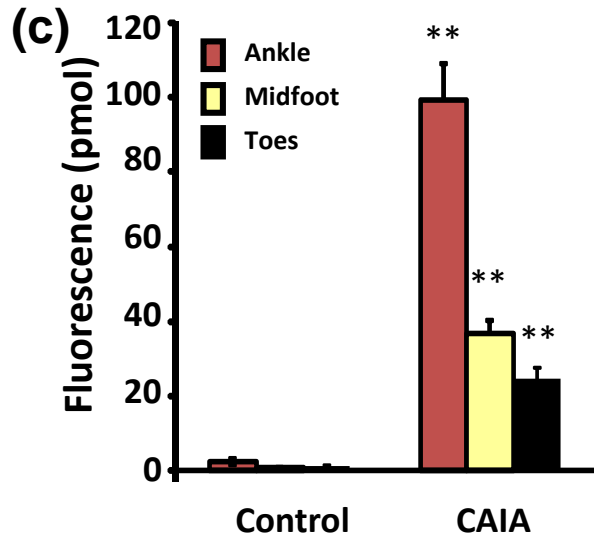

Supplement: MOESM5 [file 9693080]
